# Supplementary material for: Tres momento en la obra de Antonio Machado
Source: Royal Society of Chemistry journal article supplement (doi:10.1039/d4nr00615a), 1976-01-01
Supplement: d4nr00615a1.pdf [file d4nr00615a1.pdf]

## Wearable and Foldable Photodetector based on WSe<sub>2</sub>-MXene 2D-2D Heterostructure using Scalable Handprint Technique

Rahul P. Patel<sup>1</sup>, Parth V. Shah<sup>1</sup>, Sohel Siraj<sup>2</sup>, Parikshit Sahatiya<sup>2</sup>, Pratik M. Pataniya<sup>1</sup>, C. K. Sumesh<sup>1\*</sup>

<sup>1</sup>Department of Physical Sciences, P D Patel Institute of Applied Sciences, Charotar University of Science and Technology, CHARUSAT, Changa, Gujarat, India.

<sup>2</sup>Department of Electrical and Electronic Engineering, BITS Pilani Hyderabad, Secunderabad-500078, India.

Email: [\\*cksumesh.cv@charusat.ac.in](mailto:cksumesh.cv@charusat.ac.in)

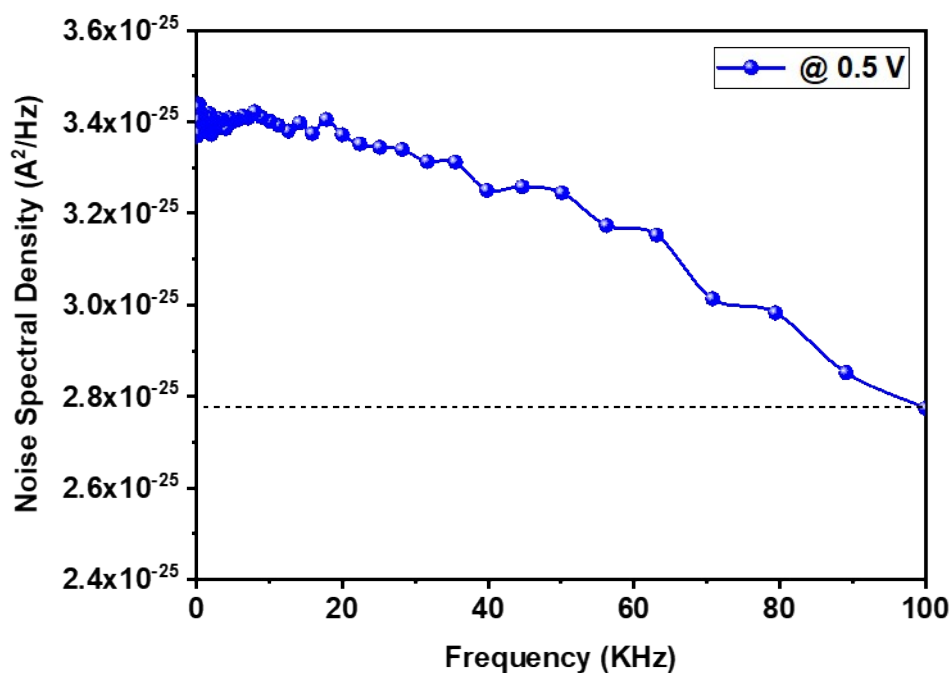

**Figure. S** The noise spectral density as a function of frequency.
